# Supplementary material for: Discovering potent and selective reversible inhibitors of enzymes in complex proteomes
Source: Springer Nature journal article supplement (doi:10.1038/nbt826), 2003-05-12
Supplement: 41587_2003_BFnbt826_MOESM1_ESM.pdf [file 41587_2003_BFnbt826_MOESM1_ESM.pdf]

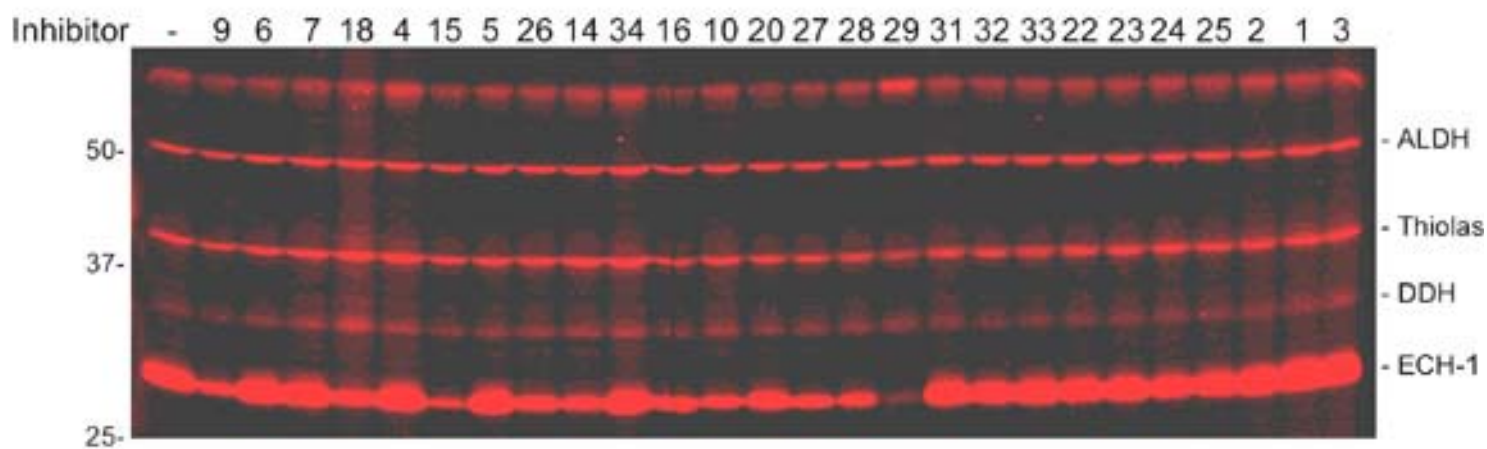

**Supplementary Fig. 1** Competitive proteomic profiling of enzymes labeled by a phenyl sulfonate ester ABPP probe (inhibitors at 10  $\mu$ M and sulfonate probe at 5  $\mu$ M; reaction time 30 min). In the heart soluble proteome, four mechanistically distinct enzymes are labeled by this sulfonate ester probe in an active site-directed manner (ref. 21): aldehyde dehydrogenase-1 (ALDH), acetyl CoA acetyltransferase (thiolase), dihydrodiol dehydrogenase (DDH), and enoyl CoA hydratase 1 (ECH-1). Of these enzymes, ECH-1 was sensitive to a subset of trifluoromethyl ketones of the inhibitor library (e.g., **15**, **29**; see Supplementary Table 3 for  $IC_{50}$  values). The sulfonate labeling of the other enzymes was not affected by members of the inhibitor library ( $IC_{50}$  values > 100  $\mu$ M).
