# Supplementary material for: Discovering potent and selective reversible inhibitors of enzymes in complex proteomes
Source: Springer Nature journal article supplement (doi:10.1038/nbt826), 2003-05-12
Supplement: 41587_2003_BFnbt826_MOESM2_ESM.pdf [file 41587_2003_BFnbt826_MOESM2_ESM.pdf]

**Supplementary Table 1.** Complete list of IC<sub>50</sub> values calculated by ABPP for the inhibitor library versus FAAH, KIAA1363, and TGH. *K<sub>i</sub>* values listed for FAAH are taken from ref. 13 and 14.

|   | Compound                                                                            | <i>K<sub>i</sub></i> (nM) | IC <sub>50</sub> [nM (95% confidence limits)] |                         |                     |
|---|-------------------------------------------------------------------------------------|---------------------------|-----------------------------------------------|-------------------------|---------------------|
|   |                                                                                     | FAAH                      | FAAH                                          | KIAA1363                | TGH                 |
| 1 | 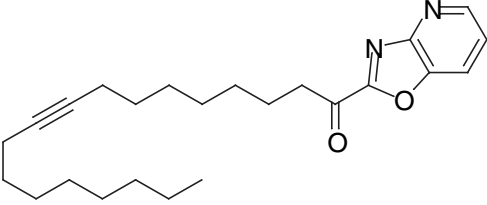   | 0.14                      | 2.6<br>(1.5-4.5)                              | 22000<br>(8600-56000)   | 480<br>(320-720)    |
| 2 |    | 0.15                      | 0.98<br>(0.65-1.5)                            | 65000<br>(30000-140000) | 0.40<br>(0.29-0.56) |
| 3 |    | 0.18                      | 1.4<br>(1.0-2.1)                              | 93000<br>(40000-200000) | 0.63<br>(0.61-0.65) |
| 4 |   | 0.2                       | 1.1<br>(0.72-1.7)                             | >100000                 | 1.4<br>(1.1-1.9)    |
| 5 |  | 0.57                      | 0.81<br>(0.56-1.1)                            | 50000<br>(21000-120000) | 83<br>(69-100)      |
| 6 |  | 2.3                       | 44<br>(31-62)                                 | 62000<br>(23000-160000) | 1400<br>(880-2400)  |
| 7 |  | 18                        | 150<br>(84-280)                               | >100000                 | >100000             |

|    |  |     |                       |                     |                      |
|----|--|-----|-----------------------|---------------------|----------------------|
| 8  |  | 25  | 2200<br>(1300-3600)   | 210<br>(170-270)    | 4.5<br>(1.4-14)      |
| 9  |  | 82  | 4500<br>(3100-6500)   | 1100<br>(730-1500)  | 4800<br>(1900-12000) |
| 10 |  | 96  | 6700<br>(4300-10000)  | 480<br>(270-850)    | 2200<br>(610-8200)   |
| 11 |  | 100 | 5500<br>(3400-8800)   | 170<br>(110-280)    | 0.9<br>(0.4-2.0)     |
| 12 |  | 100 | 2300<br>(1500-3500)   | >100000             | 9300<br>(4000-21000) |
| 13 |  | 130 | 2300<br>(1500-3600)   | >100000             | >100000              |
| 14 |  | 130 | 9900<br>(6900-14000)  | 390<br>(240-610)    | 14<br>(7.3-25)       |
| 15 |  | 140 | 11000<br>(6200-21000) | 470<br>(320-690)    | 61<br>(47-79)        |
| 16 |  | 140 | 1500<br>(990-2300)    | 940<br>(540-1600)   | 1600<br>(660-3800)   |
| 17 |  | 170 | 6500<br>(3900-11000)  | 2400<br>(1300-4200) | 1700<br>(770-3800)   |
| 18 |  | 170 | 5300<br>(3300-8300)   | 770<br>(570-1100)   | 0.47<br>(0.10-2.2)   |

|    |                                                                                     |         |                        |                       |                       |
|----|-------------------------------------------------------------------------------------|---------|------------------------|-----------------------|-----------------------|
| 19 | 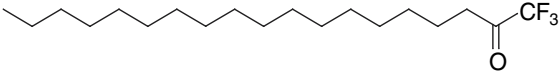   | 240     | 6400<br>(2300-18000)   | 6600<br>(3300-13000)  | 4600<br>(800-26000)   |
| 20 |    | 320     | 9800<br>(4600-21000)   | 3900<br>(1700-8700)   | 6600<br>(1900-23000)  |
| 21 |    | 370     | 10000<br>(4400-24000)  | >100000               | 13000<br>(4800-34000) |
| 22 |    | 440     | 12000<br>(7000-19000)  | 260<br>(170-380)      | 250<br>(170-360)      |
| 23 |    | 570     | 12000<br>(6300-24000)  | 89<br>(69-110)        | 280<br>(190-430)      |
| 24 |   | 780     | 13000<br>(6400-27000)  | 71<br>(42-120)        | 170<br>(120-260)      |
| 25 |  | 1200    | 15000<br>(8100-28000)  | 52<br>(38-71)         | 320<br>(230-450)      |
| 26 |  | 1200    | 30000<br>(19000-48000) | 1500<br>(1300-1700)   | 1.8<br>(1.0-3.1)      |
| 27 |  | 2800    | 19000<br>(8700-42000)  | 290<br>(99-820)       | 970<br>(540-1800)     |
| 28 |  | 4400    | 37000<br>(16000-84000) | 110<br>(86-150)       | 160<br>(86-310)       |
| 29 |  | >100000 | >100000                | 15000<br>(5000-44000) | 3500<br>(1900-6300)   |

|    |                                                                                   |         |                      |                        |                     |
|----|-----------------------------------------------------------------------------------|---------|----------------------|------------------------|---------------------|
| 30 | 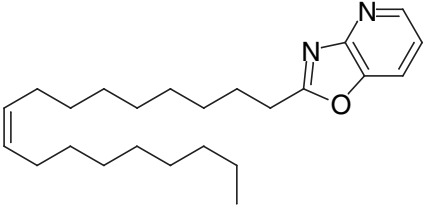 | >100000 | >100000              | >100000                | >100000             |
| 31 |  | NA      | >100000              | 11000<br>(8300-15000)  | 2.1<br>(1.1-3.7)    |
| 32 |  | NA      | >100000              | 26000<br>(17000-41000) | 1400<br>(450-4500)  |
| 33 |  | NA      | >100000              | >100000                | 11<br>(5.2-23)      |
| 34 |  | NA      | 8800<br>(5600-14000) | 3000<br>(2000-4500)    | 1800<br>(1300-2500) |

---
