# Supplementary material for: Discovering potent and selective reversible inhibitors of enzymes in complex proteomes
Source: Springer Nature journal article supplement (doi:10.1038/nbt826), 2003-05-12
Supplement: 41587_2003_BFnbt826_MOESM3_ESM.pdf [file 41587_2003_BFnbt826_MOESM3_ESM.pdf]

**Supplementary Table 2.** A comparison of  $K_i$  and  $IC_{50}$  values for TGH inhibition measured by substrate assays and ABPP, respectively. Note that all of the  $IC_{50}$  values determined by ABPP are within 5-fold of the  $K_i$  values determined by substrate assays. See Supplementary Methods for details on TGH substrate assay and data analysis.

|    |                                                                                     | TGH                       |                    |
|----|-------------------------------------------------------------------------------------|---------------------------|--------------------|
|    |                                                                                     | $K_i$ (nM)                | $IC_{50}$ (nM)     |
| 4  | 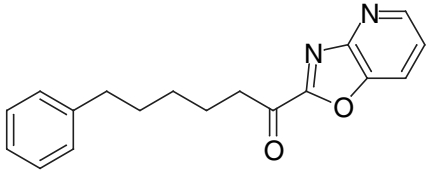   | 3.5<br>(2.3-4.3)          | 1.4<br>(1.1-1.9)   |
| 6  |    | 980<br>(600-1200)         | 1400<br>(880-2400) |
| 7  |   | 203000<br>(170000-240000) | >100000            |
| 18 |  | 0.29<br>(0.19-0.53)       | 0.47<br>(0.10-2.2) |
| 25 |  | 240<br>(200-270)          | 320<br>(230-450)   |
