# Supplementary material for: Discovering potent and selective reversible inhibitors of enzymes in complex proteomes
Source: Springer Nature journal article supplement (doi:10.1038/nbt826), 2003-05-12
Supplement: 41587_2003_BFnbt826_MOESM4_ESM.pdf [file 41587_2003_BFnbt826_MOESM4_ESM.pdf]

**Supplementary Table 3.** IC<sub>50</sub> values for enoyl CoA-hydratase-1 (ECH) inhibition measured by ABPP with a phenyl sulfonate ester probe. Inhibitors were tested over a concentration range of 0.1-100 μM. Inhibitors not listed in this table showed no detectable activity against ECH (IC<sub>50</sub> values > 100 μM).

|    |                                                                                     | ECH (μM) |
|----|-------------------------------------------------------------------------------------|----------|
| 9  | 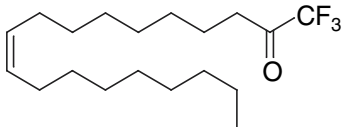   | 2.2      |
| 10 |    | 2.2      |
| 14 |    | 2.1      |
| 15 |    | 0.63     |
| 16 |   | 7.0      |
| 18 |  | 1.8      |
| 20 |  | 16       |
| 26 |  | 2.5      |
| 27 |  | 4.4      |
| 28 |  | 3.4      |
| 29 |  | 0.68     |

---

32

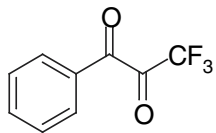

9.0

34

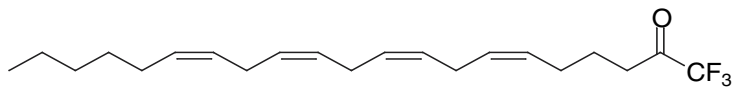

32

---
