# Supplementary material for: Discovering potent and selective reversible inhibitors of enzymes in complex proteomes
Source: Springer Nature journal article supplement (doi:10.1038/nbt826), 2003-05-12
Supplement: 41587_2003_BFnbt826_MOESM5_ESM.pdf [file 41587_2003_BFnbt826_MOESM5_ESM.pdf]

## Supplementary Methods

**Inhibition studies of TGH using a substrate assay.** Inhibition of TGH activity was assayed using COS-7-expressed TGH and the chromogenic substrate, *p*-nitrophenyl laurate at 37°C as described previously (ref. 18). Mock-transfected COS-7 cells expressed negligible hydrolysis activity. IC<sub>50</sub> values were determined from the inhibition observed at 7 different inhibitor concentrations (three trials each) by using the formula  $IC_{50} = [I]/[(v_0/v_i)-1]$ , where  $v_0$  is the control reaction rate without inhibitor and  $v_i$  is the rate with inhibitor at concentration  $[I]$ .  $K_i$  values were determined by the Dixon plot {x-intercepts of weighted linear fits of  $[I]$  vs  $1/\text{rate}$  plots at a constant substrate concentration ( $[S] = 100\mu\text{M}$ ), which were converted to  $K_i$  values by using the formula  $K_i = -x_{int}/[1+[S]/K_m]$ .

**Cluster analysis of inhibitor sensitivity profiles.** For the comparison of IC<sub>50</sub> and  $K_i$  values for FAAH inhibition (Fig. 3A), the reciprocal IC<sub>50</sub> (or  $K_i$ ) value for the most potent inhibitor was normalized to 1 and the reciprocal IC<sub>50</sub> (or  $K_i$ ) values of other inhibitors expressed as a fraction of this value. These data were multiplied by 100,000, log-transformed, and, for the purpose of visualization, shifted by -2.5 to create a range of values from -2.5 to 2.5. For the potency cluster analysis (Fig. 3B), reciprocal IC<sub>50</sub> values (in nM) were divided by 0.00001, log-transformed, and, for the purpose of visualization, shifted by -2.7 to create a range of values from -2.7 to +2.7, with the most potent inhibitor being +2.7 (IC<sub>50</sub> value = 0.4 nM). For the selectivity cluster analysis (Fig. 3C), the reciprocal IC<sub>50</sub> value for the most potently inhibited target of each inhibitor was normalized to 1 and the degree of inhibition of the other targets expressed as a fraction of this value. All data were analyzed with a hierarchical clustering algorithm using the Pearson correlation coefficient as the measure of similarity (Gene Cluster computer package; ref. 19).
